# Supplementary material for: Warming effects of reduced sulfur emissions from shipping
Source: Copernicus journal article supplement (doi:10.5194/egusphere-2024-1428), 2024-05-17
Supplement: Supplementary file 1 [file egusphere-2024-1428-supplement.pdf]

Supplement to Warming effects of reduced sulfur emissions from shipping

Masaru Yoshioka, Daniel Grosvenor, Ben B. B. Booth, Chris Smith, and Ken S. Carslaw

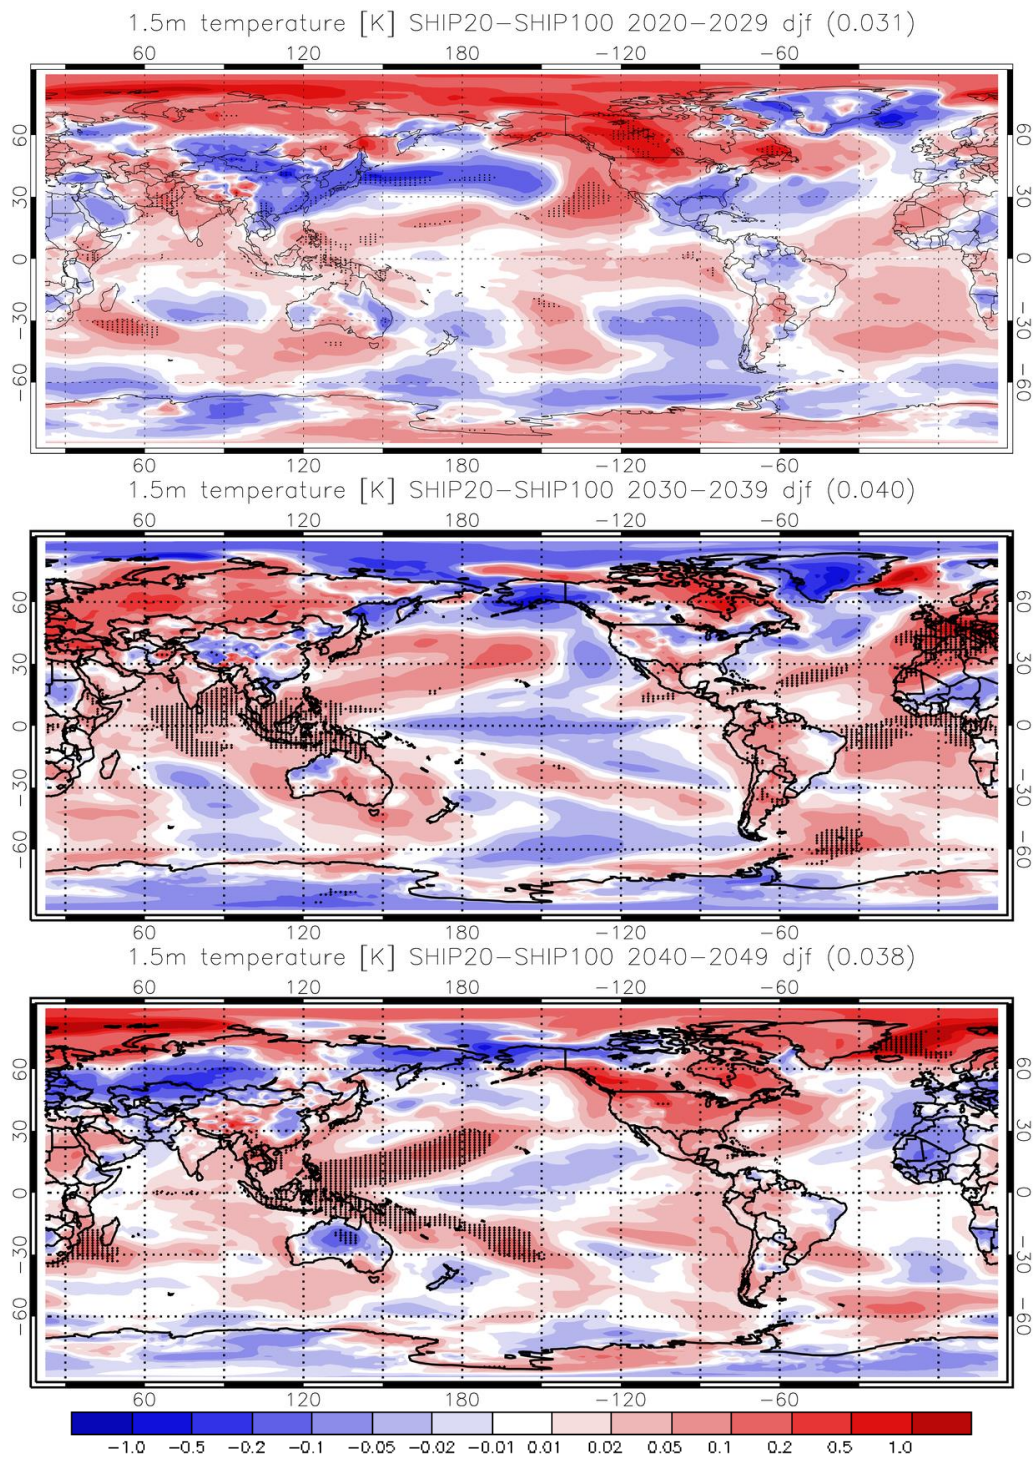

Figure S1. Same as Figure 4 but for DJF.

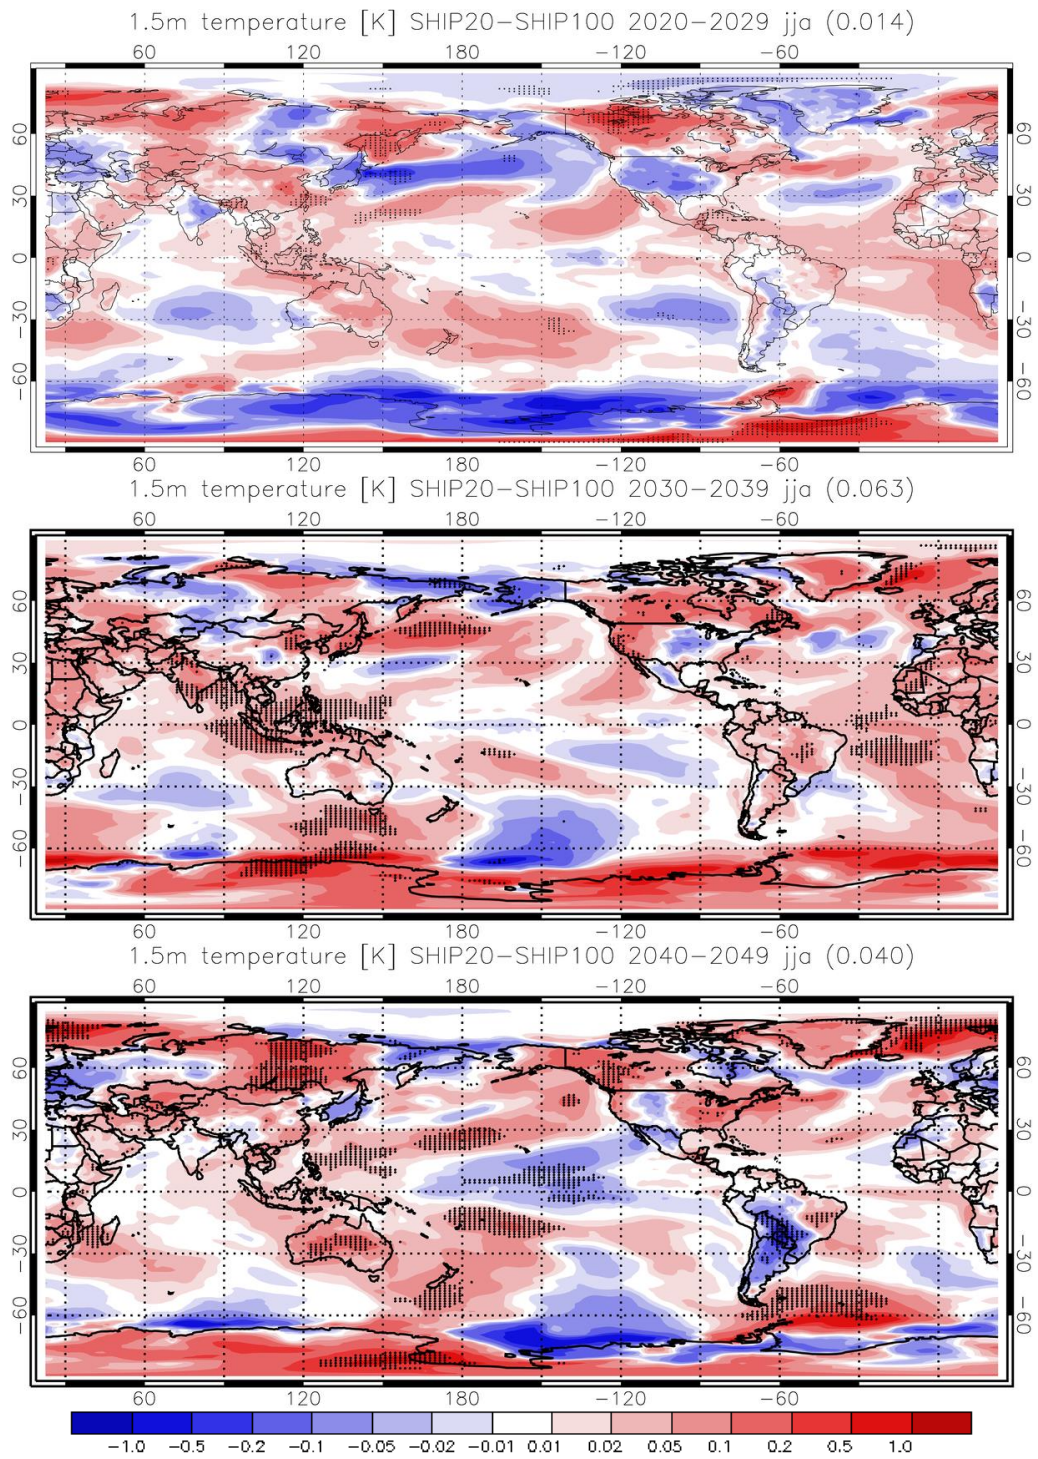

Figure S2. Same as Figure 4 but for JJA.

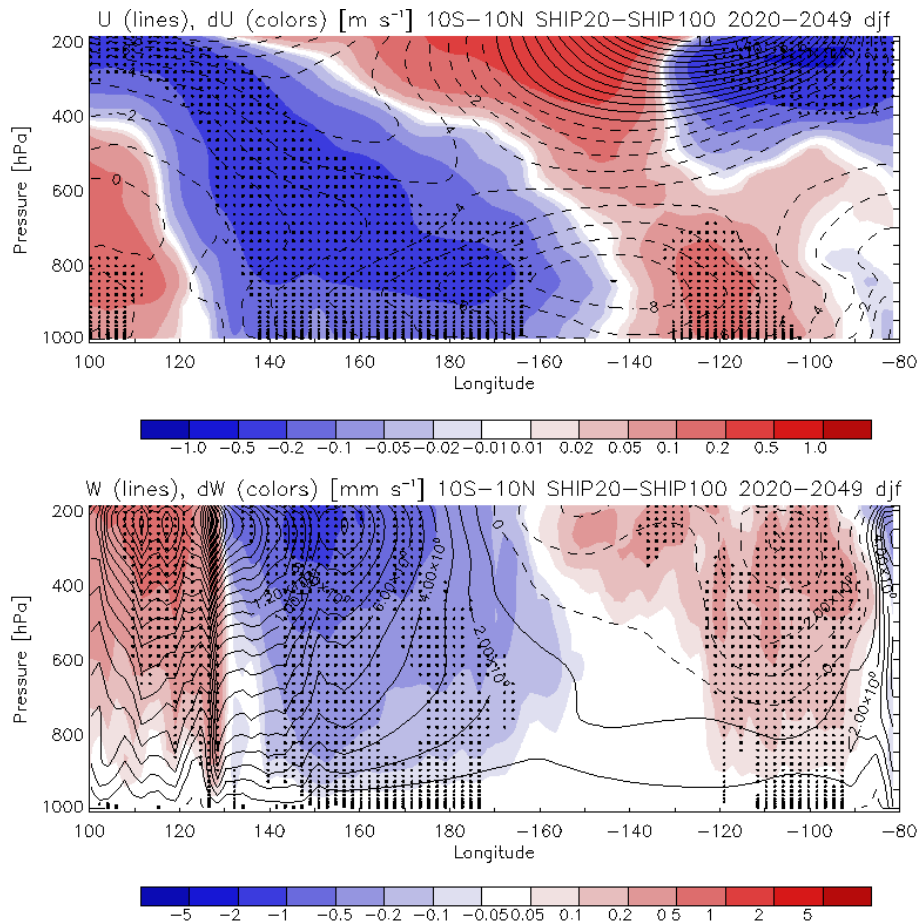

**Figure S3. Ensemble mean DJF zonal (positive eastward; U;  $\text{m s}^{-1}$ ; top panel) and vertical (positive upward; W) winds ( $\text{mm s}^{-1}$ ) in SHIP100 (line contours) over the equatorial Pacific (averaged for 10S-10N and shown for 100E-80W and surface-200hPa) and changes in U ( $\Delta U$ ) and W ( $\Delta W$ ) from SHIP100 to SHIP20 (colors). Positive (solid lines and red colors) and negative (dashed lines and blue colors) regions for U (top panel) show eastward and westward motions, respectively, whereas for W (bottom panels) they show upward and downward motions, respectively. Hatching indicates areas where the differences are statistically significant at a 95% confidence level.**

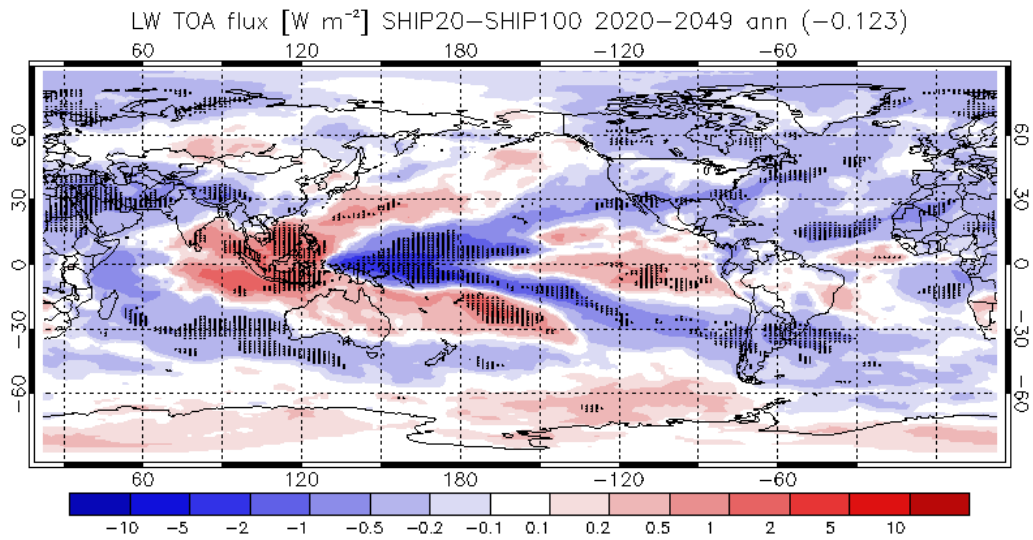

**Figure S4.** Difference (SHIP20-SHIP100) in ensemble mean LW radiative flux ( $\text{W m}^{-2}$ ) at the top of the atmosphere. Respectively, blue and red colours indicate cooling and warming effects induced by the reduction of shipping sulfur emission.

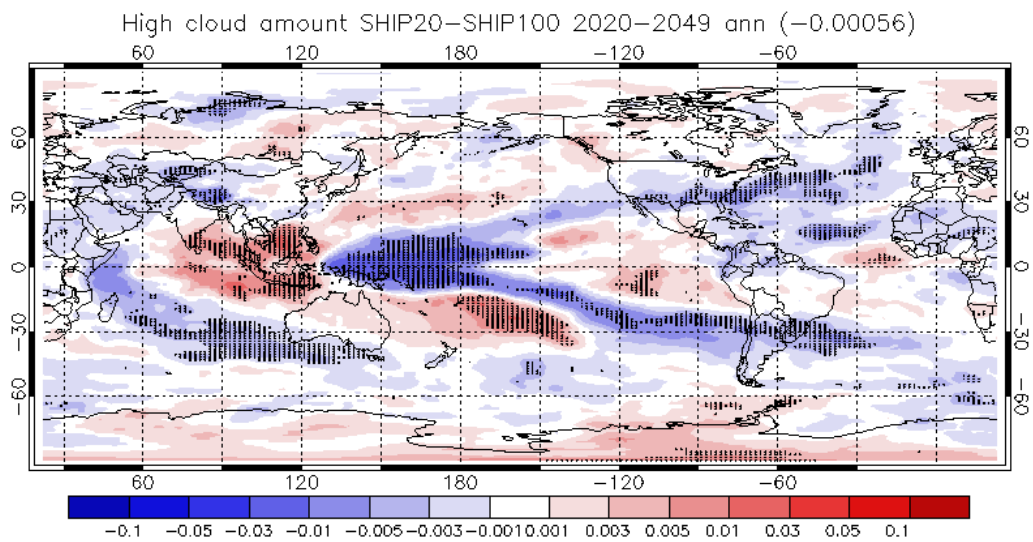

**Figure S5.** Difference (SHIP20-SHIP100) in ensemble annual means of high-level cloud fractions. High-level clouds indicate clouds in the levels approximately 5600-13600m.

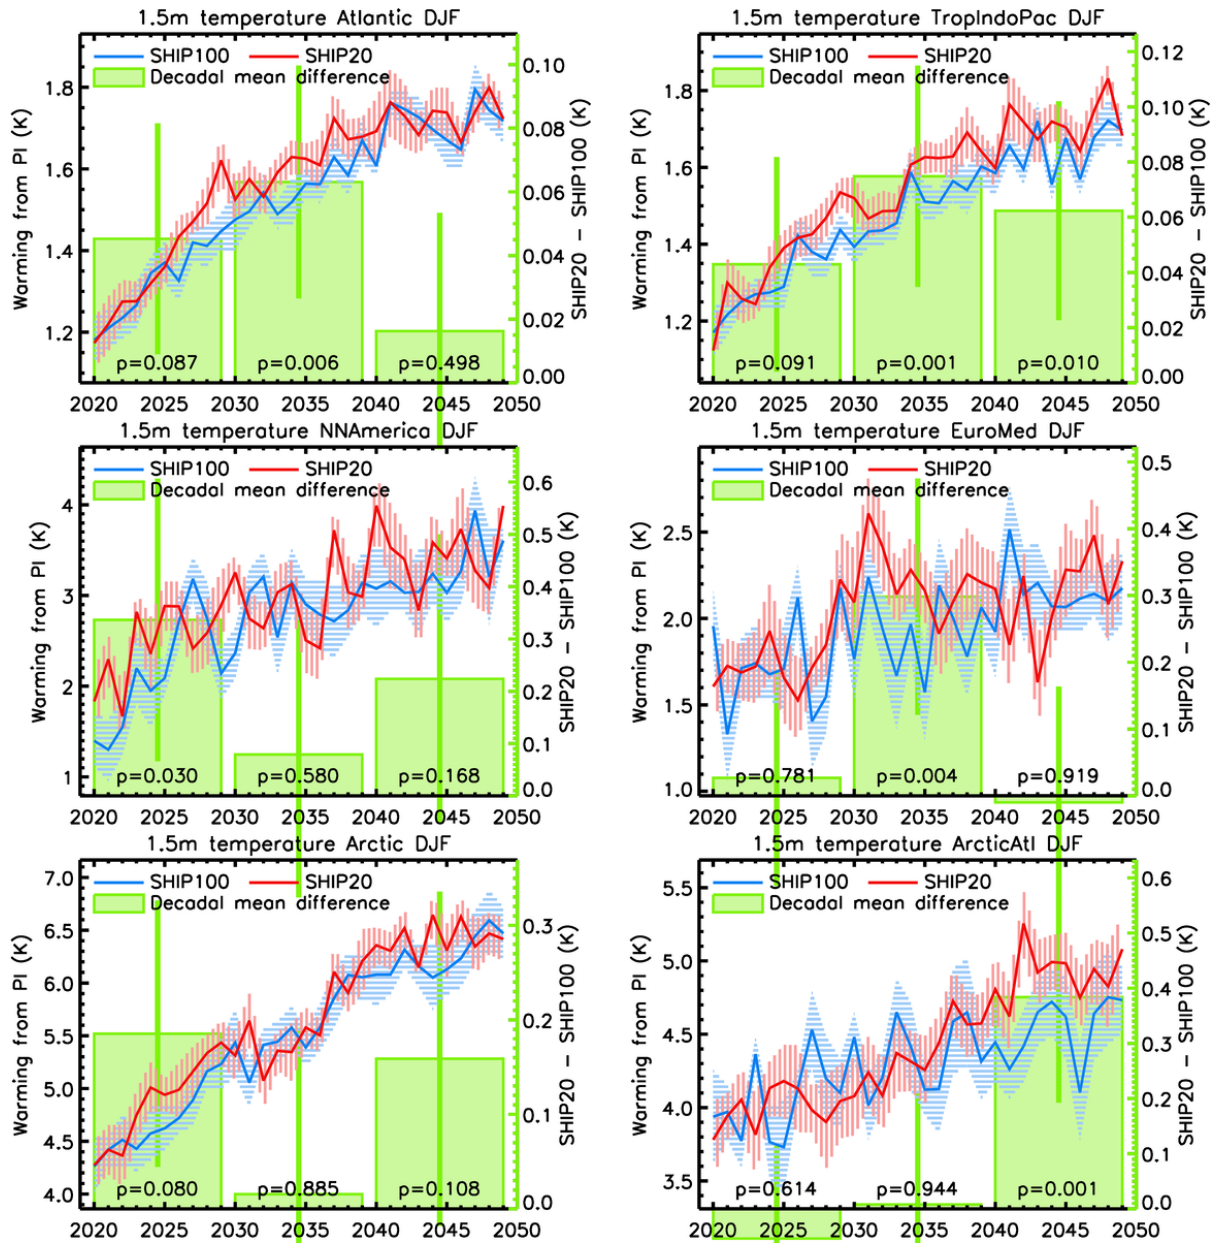

Figure S6. Same as Figure 7 but for DJF averages

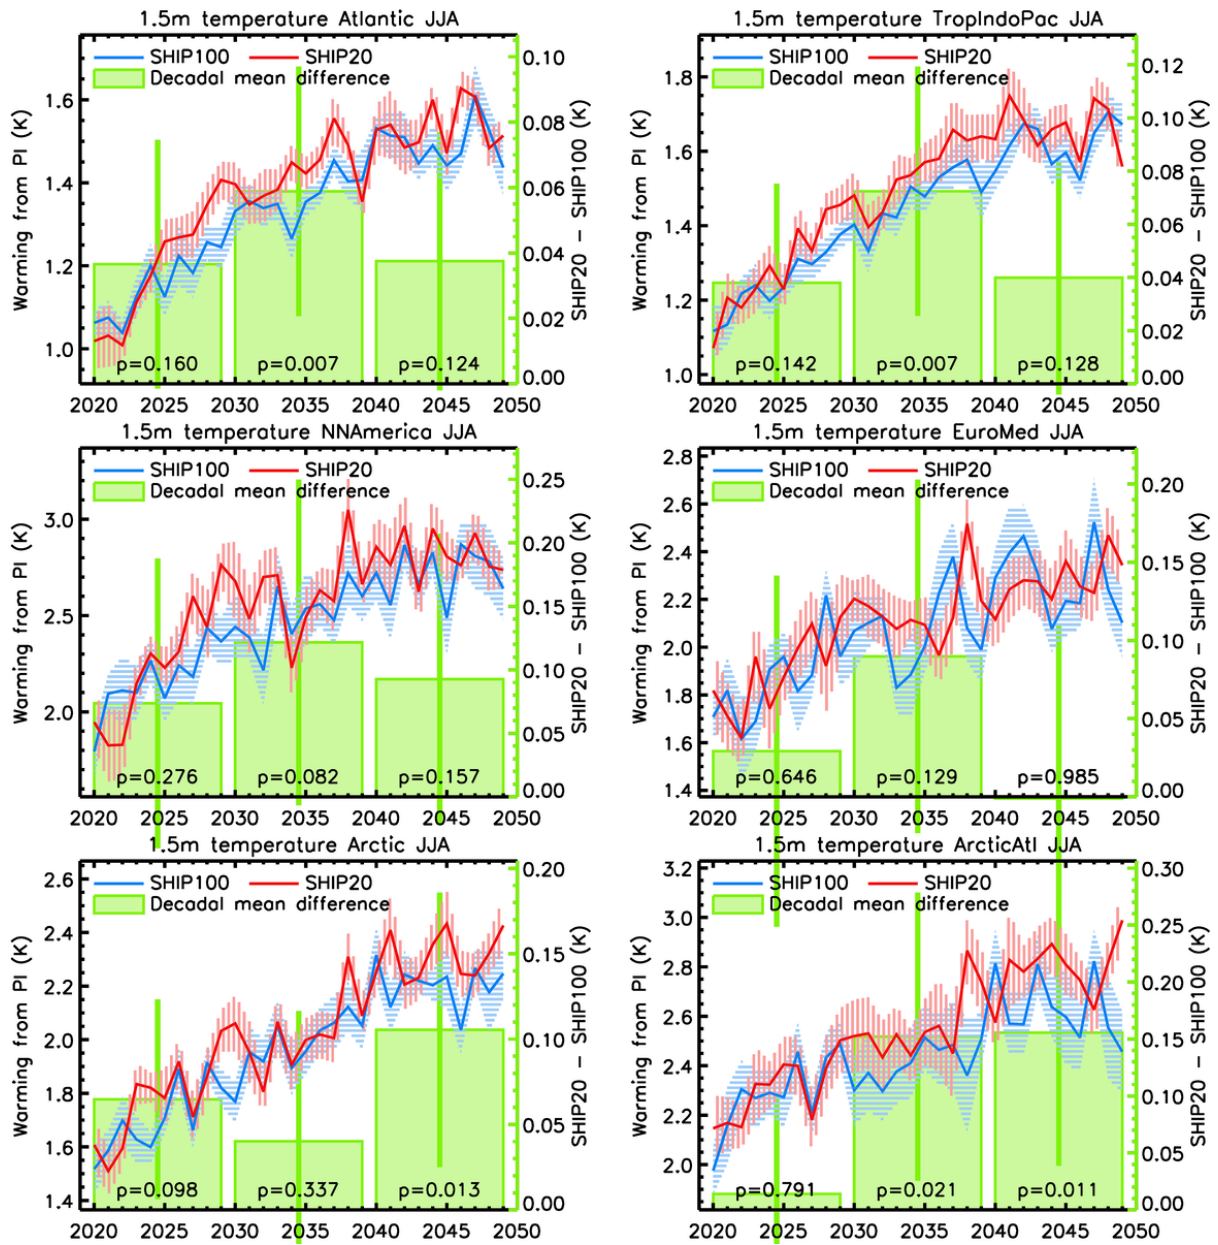

Figure S7. Same as Figure 7 but for JJA averages
