# Supplementary material for: Warming effects of reduced sulfur emissions from shipping
Source: Copernicus journal article supplement (doi:10.5194/egusphere-2024-1428), 2024-05-17
Supplement: Supplementary file [file egusphere-2024-1428-AC2-supplement.pdf]

SW TOA flux [ $\text{W m}^{-2}$ ] SHIP20-SHIP100 2020-2049 djf (0.13)

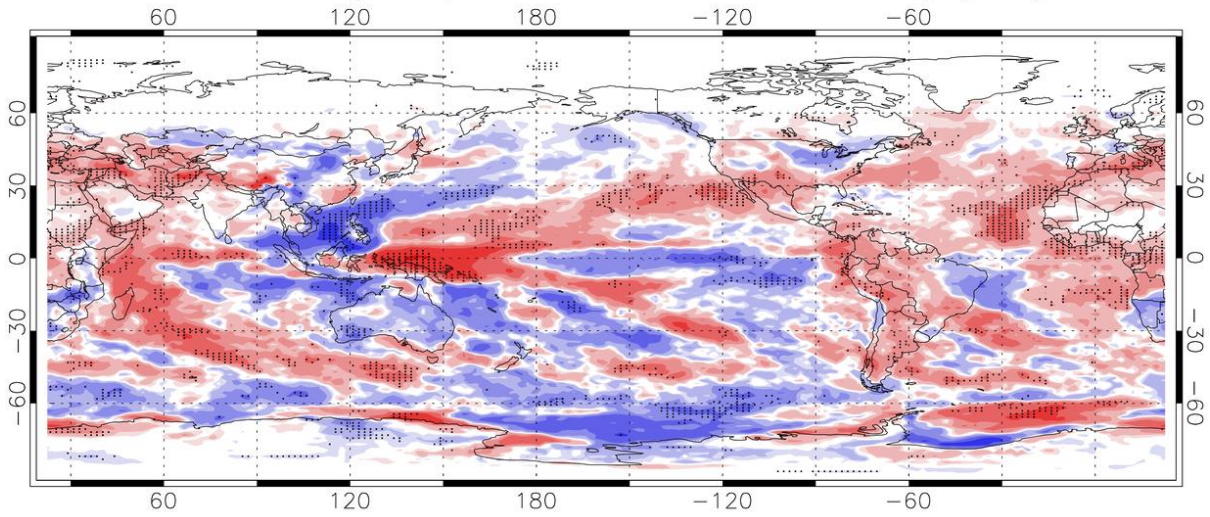

SW TOA flux [ $\text{W m}^{-2}$ ] SHIP20-SHIP100 2020-2049 jja (0.20)

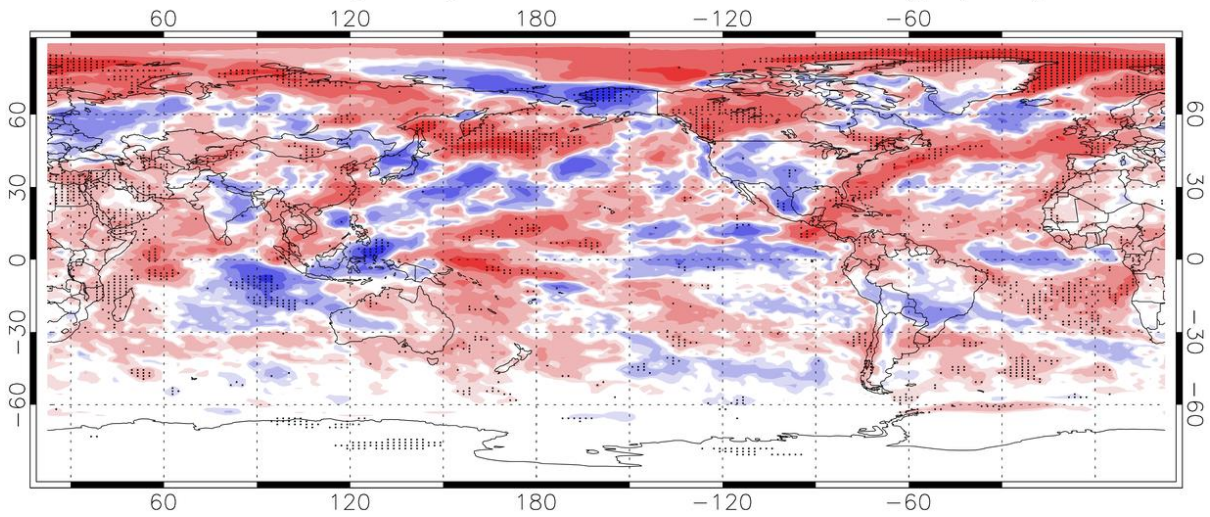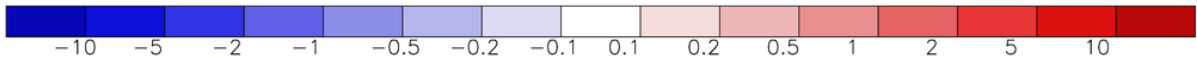

Positive downward (warming)
